# Supplementary material for: Development of a Rapid Automated Fluorescent Lateral Flow Immunoassay to Detect Hepatitis B Surface Antigen (HBsAg), Antibody to HBsAg, and Antibody to Hepatitis C
Source: PubMed Central journal article supplement — Ann Lab Med. 2018 Jul 18;38(6):578–84. doi: 10.3343/alm.2018.38.6.578 (PMC6056386; doi:10.3343/alm.2018.38.6.578), 2018-07-18
Supplement: alm-38-578-s001.pdf [file alm-38-578-s001.pdf]

**Supplemental Data Table S1.** Cross-reactivity tests of AFIAS HBsAg, anti-HBs, and anti-HCV using highly positive samples for other virus-specific IgGs

| Reactive samples                     | Test method                                               | AFIAS HBsAg negative, N (%) | AFIAS anti-HBs negative, N (%) | AFIAS anti-HCV negative, N (%) |
|--------------------------------------|-----------------------------------------------------------|-----------------------------|--------------------------------|--------------------------------|
| CMV-IgG                              | Immulin 2000 CMV IgG (Siemens)                            | 20 (100)                    | 10 (100)                       | 20 (100)                       |
| EBV-IgG                              | anti-EBV-EA-D ELISA (IgG) (Euroimmun)                     | 20 (100)                    | 10 (100)                       | 20 (100)                       |
| HAV-IgG & IgM                        | Elecsys anti-HAV total (Roche Diagnostics)                | 20 (100)                    | 10 (100)                       | 20 (100)                       |
| HSV-IgG                              | Chorus Herpes Simplex 1+2 IgG (Diesse Diagnostica Senese) | 20 (100)                    | 10 (100)                       | 20 (100)                       |
| Rubella-IgG                          | Immulin 2000 Rubella Quantitative IgG (Siemens)           | 20 (100)                    | 10 (100)                       | 20 (100)                       |
| Varicella-zoster IgG                 | Chorus Varicella IgG (Diesse Diagnostica Senese)          | 20 (100)                    | 10 (100)                       | 20 (100)                       |
| anti- <i>Treponema pallidum</i> -IgG | HiSens Auto TP Ab LTIA (HBi)                              | 20 (100)                    | 10 (100)                       | 20 (100)                       |

Abbreviations: AFIAS, Automated Fluorescent Immunoassay System; HBsAg, hepatitis B surface antigen; anti-HBs, antibody to HBsAg; anti-HCV, antibody to hepatitis C virus; EBV, Epstein-Barr virus; CMV, cytomegalovirus; HAV, hepatitis A virus; HSV, herpes simplex virus.
