# Supplementary material for: Development of a Rapid Automated Fluorescent Lateral Flow Immunoassay to Detect Hepatitis B Surface Antigen (HBsAg), Antibody to HBsAg, and Antibody to Hepatitis C
Source: PubMed Central journal article supplement — Ann Lab Med. 2018 Jul 18;38(6):578–84. doi: 10.3343/alm.2018.38.6.578 (PMC6056386; doi:10.3343/alm.2018.38.6.578), 2018-07-18
Supplement: alm-38-578-s002.pdf [file alm-38-578-s002.pdf]

**Supplemental Data Table S2.** Dilution tests for AFIAS HBsAg assay

| No. Case                            | WHO standard 12/226 (IU/mL) | AFIAS HBsAg (COI) | CV (%) |
|-------------------------------------|-----------------------------|-------------------|--------|
| 1                                   | 47.30                       | 255.69*           | 6.0    |
| 2                                   | 23.50                       | 121.52            | 7.2    |
| 3                                   | 11.75                       | 92.43             | 3.1    |
| 4                                   | 5.88                        | 60.48             | 3.7    |
| 5                                   | 2.94                        | 43.37             | 2.0    |
| 6                                   | 1.47                        | 21.64             | 7.7    |
| 7                                   | 0.73                        | 13.18             | 7.5    |
| 8                                   | 0.37                        | 4.42              | 1.3    |
| 9                                   | 0.18                        | 2.82              | 6.1    |
| 10                                  | 0.09                        | 1.26              | 6.9    |
| 11                                  | 0.05                        | 1.11              | 8.9    |
| 12                                  | 0.02                        | 0.88              | 14.4   |
| 13                                  | 0.01                        | 0.49              | 19.5   |
| Cut-off Sensitivity (cut-off = 1.0) |                             | ≤0.05 IU/mL       |        |

\*Mean of triplicate results.

Abbreviations: AFIAS, Automated Fluorescent Immunoassay System; HBsAg, hepatitis B surface antigen; COI, cut-off index.
