# Supplementary material for: Development of a Rapid Automated Fluorescent Lateral Flow Immunoassay to Detect Hepatitis B Surface Antigen (HBsAg), Antibody to HBsAg, and Antibody to Hepatitis C
Source: PubMed Central journal article supplement — Ann Lab Med. 2018 Jul 18;38(6):578–84. doi: 10.3343/alm.2018.38.6.578 (PMC6056386; doi:10.3343/alm.2018.38.6.578), 2018-07-18
Supplement: alm-38-578-s003.pdf [file alm-38-578-s003.pdf]

**Supplemental Data Table S3.** Samples with discrepant HBsAg results among the test methods

| No. Case | Sample                  | Elecsys HBsAg (COI) | AFIAS HBsAg (COI) | ARCHITECT HBsAg (COI) |
|----------|-------------------------|---------------------|-------------------|-----------------------|
| 1        | Serum*                  | 179.700             | 0.32              |                       |
| 2        | Serum <sup>†</sup>      | 0.459               | 48.38             |                       |
| 3        | Serum <sup>†</sup>      | 0.490               | 1.48              |                       |
| 4        | Serum <sup>†</sup>      | 0.430               | 1.55              |                       |
| 5        | Serum <sup>†</sup>      | 0.576               | 74.71             |                       |
| 6        | Serum <sup>†</sup>      | 0.559               | > 300.00          |                       |
| 7        | Serum <sup>†</sup>      | 0.450               | 1.02              |                       |
| 8        | Serum <sup>†</sup>      | 0.512               | 3.39              |                       |
| 9        | Serum <sup>†</sup>      | 0.412               | 1.13              |                       |
| 10       | HBV6285 <sup>‡</sup>    | 1.240               | 0.05              | 1.42                  |
| 11       | HBV11005 <sup>‡</sup>   | 0.351               | 0.01              | 1.71                  |
| 12       | HBV6293-3 <sup>‡</sup>  | 0.566               | 0.01              | 1.20                  |
| 13       | HBV6293-4 <sup>‡</sup>  | 1.310               | 0.07              | 7.75                  |
| 14       | HBV9273 <sup>‡</sup>    | 1.790               | 0.02              | 1.06                  |
| 15       | HBV11002-3 <sup>‡</sup> | 1.210               | 0.13              | 1.71                  |
| 16       | HBV11002-4 <sup>‡</sup> | 1.640               | 0.31              | 2.09                  |
| 17       | HBV11064 <sup>‡</sup>   | 2.000               | 0.01              | 0.27                  |

\*False-negative result of AFIAS HBsAg from an inactive chronic carrier.

<sup>†</sup>False-positive results of AFIAS HBsAg in two sera from healthy individuals and six sera from patients with other chronic diseases. Two patients had a post-liver transplant status due to hepatitis B infection.

<sup>‡</sup>Seroconversion panel.

Abbreviations: HBsAg, hepatitis B surface antigen; HBV, hepatitis B virus; COI, cut-off index; AFIAS, Automated Fluorescent Immunoassay System.
