# Supplementary material for: Development of a Rapid Automated Fluorescent Lateral Flow Immunoassay to Detect Hepatitis B Surface Antigen (HBsAg), Antibody to HBsAg, and Antibody to Hepatitis C
Source: PubMed Central journal article supplement — Ann Lab Med. 2018 Jul 18;38(6):578–84. doi: 10.3343/alm.2018.38.6.578 (PMC6056386; doi:10.3343/alm.2018.38.6.578), 2018-07-18
Supplement: alm-38-578-s004.pdf [file alm-38-578-s004.pdf]

**Supplemental Data Table S4.** Dilution tests for AFIAS anti-HBs test

| No. Case | KFDA standard 08/026 (IU/L) | AFIAS anti-HBs (COI)* | CV % |
|----------|-----------------------------|-----------------------|------|
| 1        | 25,000.0                    | 1,521.4               | 3.2  |
| 2        | 12,500.0                    | 1,501.3               | 1.9  |
| 3        | 6,250.0                     | 1,307.5               | 1.7  |
| 4        | 3,125.0                     | 1,175.2               | 1.9  |
| 5        | 1,562.5                     | 1,039.3               | 7.2  |
| 6        | 781.3                       | 724.4                 | 1.9  |
| 7        | 390.6                       | 389.5                 | 6.0  |
| 8        | 195.3                       | 189.5                 | 4.2  |
| 9        | 97.7                        | 102.8                 | 7.6  |
| 10       | 48.8                        | 69.3                  | 4.0  |
| 11       | 24.4                        | 28.6                  | 8.7  |
| 12       | 12.2                        | 11.3                  | 8.9  |
| 13       | 6.1                         | 5.3                   | 8.7  |
| 14       | 3.1                         | 2.5                   | 42.3 |

\*Mean of five measurements.

Abbreviations: AFIAS, Automated Fluorescent Immunoassay System; anti-HBs, antibody to HBsAg; KFDA, Korea Food and Drug Administration; COI, cut-off index.
